# Supplementary material for: Nox4 regulates InsP3 receptor‐dependent Ca2+ release into mitochondria to promote cell survival
Source: PubMed Central journal article supplement (PMC7527947; doi:10.15252/embj.2019103530), 2020-08-10
Supplement: EMBJ-39-e103530-s002.pdf [file EMBJ-39-e103530-s002.pdf]

## Expanded View Figures

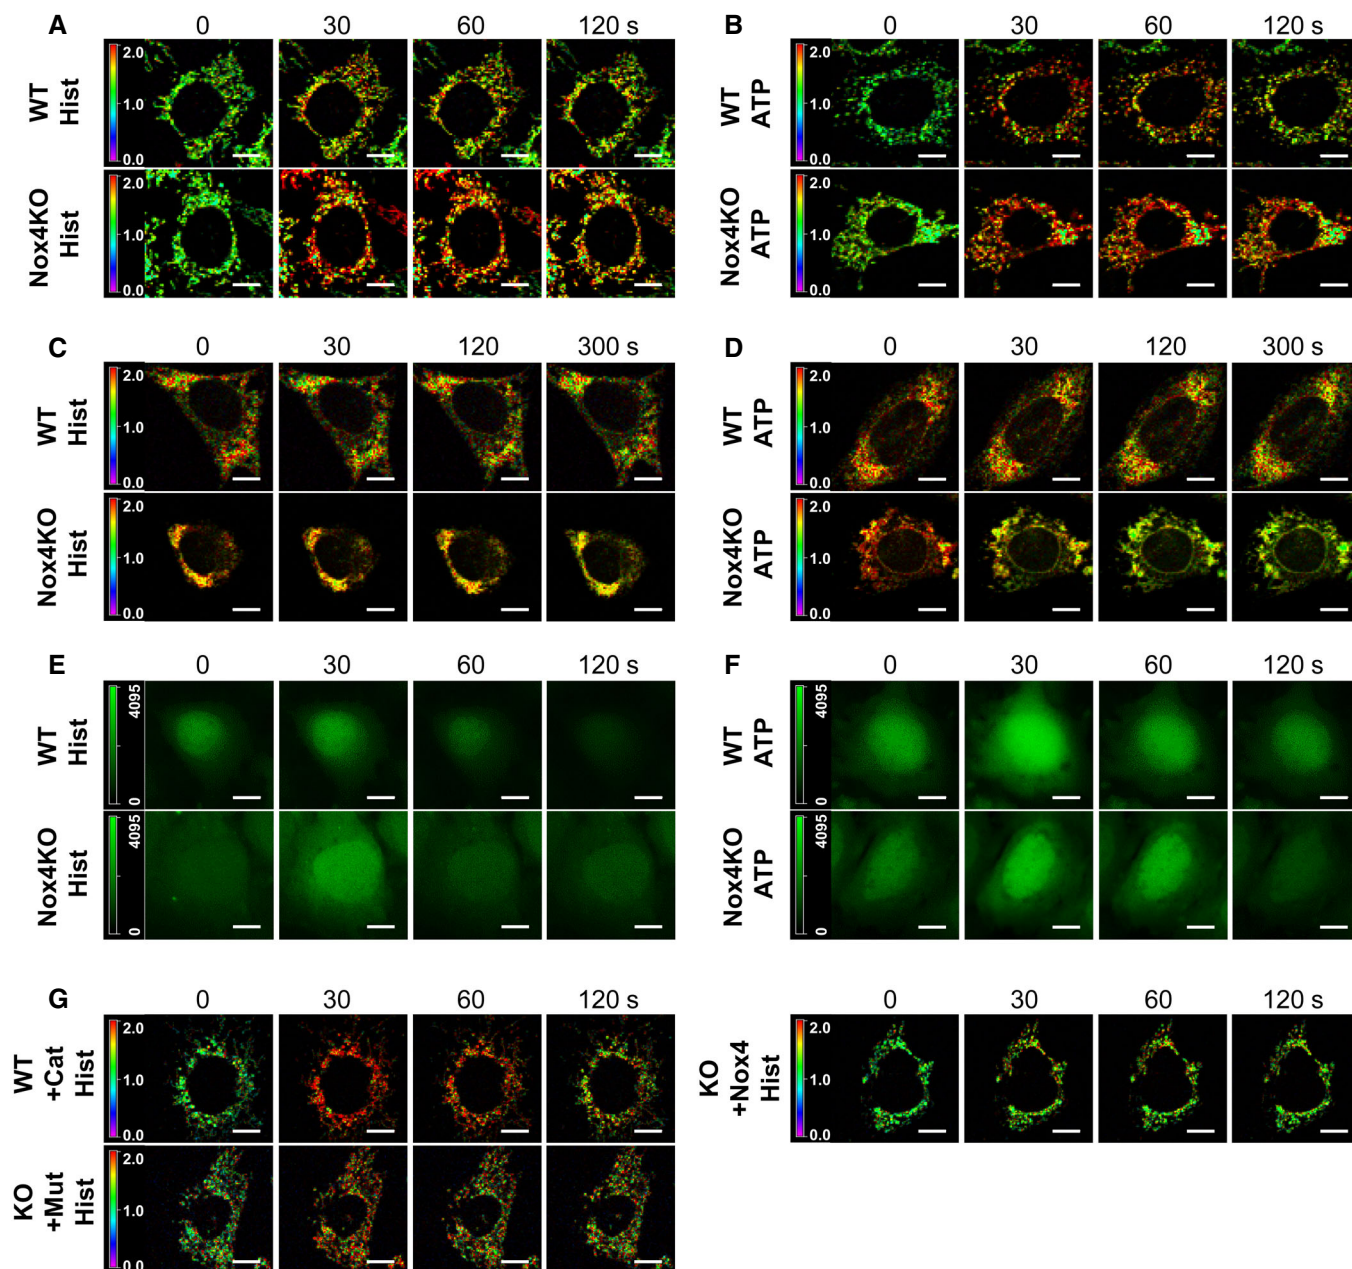

**Figure EV1. Effect of Nox4 on subcellular calcium levels in stressed cells.**

- A, B Time course of changes in mitochondrial calcium levels in serum-starved WT and Nox4KO MEFs after treatment with histamine (Hist, A) or ATP (B). Images show the YFP/CFP ratio; agonists were added at  $t = 15$  s. Related to Fig 2C and D, respectively. Scale bars: 10  $\mu$ m.
- C, D Time course of changes in ER calcium levels in serum-starved WT and Nox4KO MEFs after treatment with histamine (C) or ATP (D). Images show YFP/CFP ratio; agonists added at  $t = 15$  s. Related to Fig 2E and F, respectively. Scale bars: 10  $\mu$ m.
- E, F Time course of changes in cytosolic calcium levels in serum-starved WT and Nox4KO MEFs after treatment with histamine (E) or ATP (F). Images show Fluo4 fluorescence. Related to Fig 2G and H, respectively. Scale bars: 10  $\mu$ m.
- G Time course of histamine-induced changes in mitochondrial calcium levels in serum-starved WT and Nox4KO MEFs as in (A). Cat = PEG-catalase. Nox4KO MEFs were transfected with active Nox4 or a catalytically inactive mutant (Mut). Relates to Fig 2I and J. Scale bars: 10  $\mu$ m.

**Figure EV2. Nox4 influences mitochondrial calcium levels via InsP<sub>3</sub>R.**

- A, B Time course of histamine (Hist)-induced changes in mitochondrial calcium levels in serum-starved WT and Nox4 KO MEFs. TMRE<sup>+</sup> cells shown in (A) and TMRE<sup>-</sup> cells in (B). Sequential images to the right show YFP/CFP ratio, with quantification presented in the graphs. *n* = 3/group (with > 30 cells per individual experiment). Scale bars: 10 μm.
- C Peak histamine-induced increase in mitochondrial calcium levels in serum-starved WT and Nox4 KO MEFs with or without treatment with bongkreikic acid (BA) to inhibit the mPTP. *n* = 3/group (with > 30 cells per individual experiment).
- D Effect of caffeine or histamine on subcellular calcium levels in serum-starved cardiomyocytes depleted of Nox4 or treated with a control scrambled siRNA (siScr). Percent changes in peak calcium levels are shown. *n* = 3/group (with > 30 cells per individual experiment).

Data information: Data are mean ± SEM. \*\**P* < 0.01; \*\*\**P* < 0.001; \*\*\*\**P* < 0.0001 among compared groups or vs. control. (A,B): 2-way repeated measures ANOVA; (C): 1-way ANOVA; (D): unpaired *t*-test.

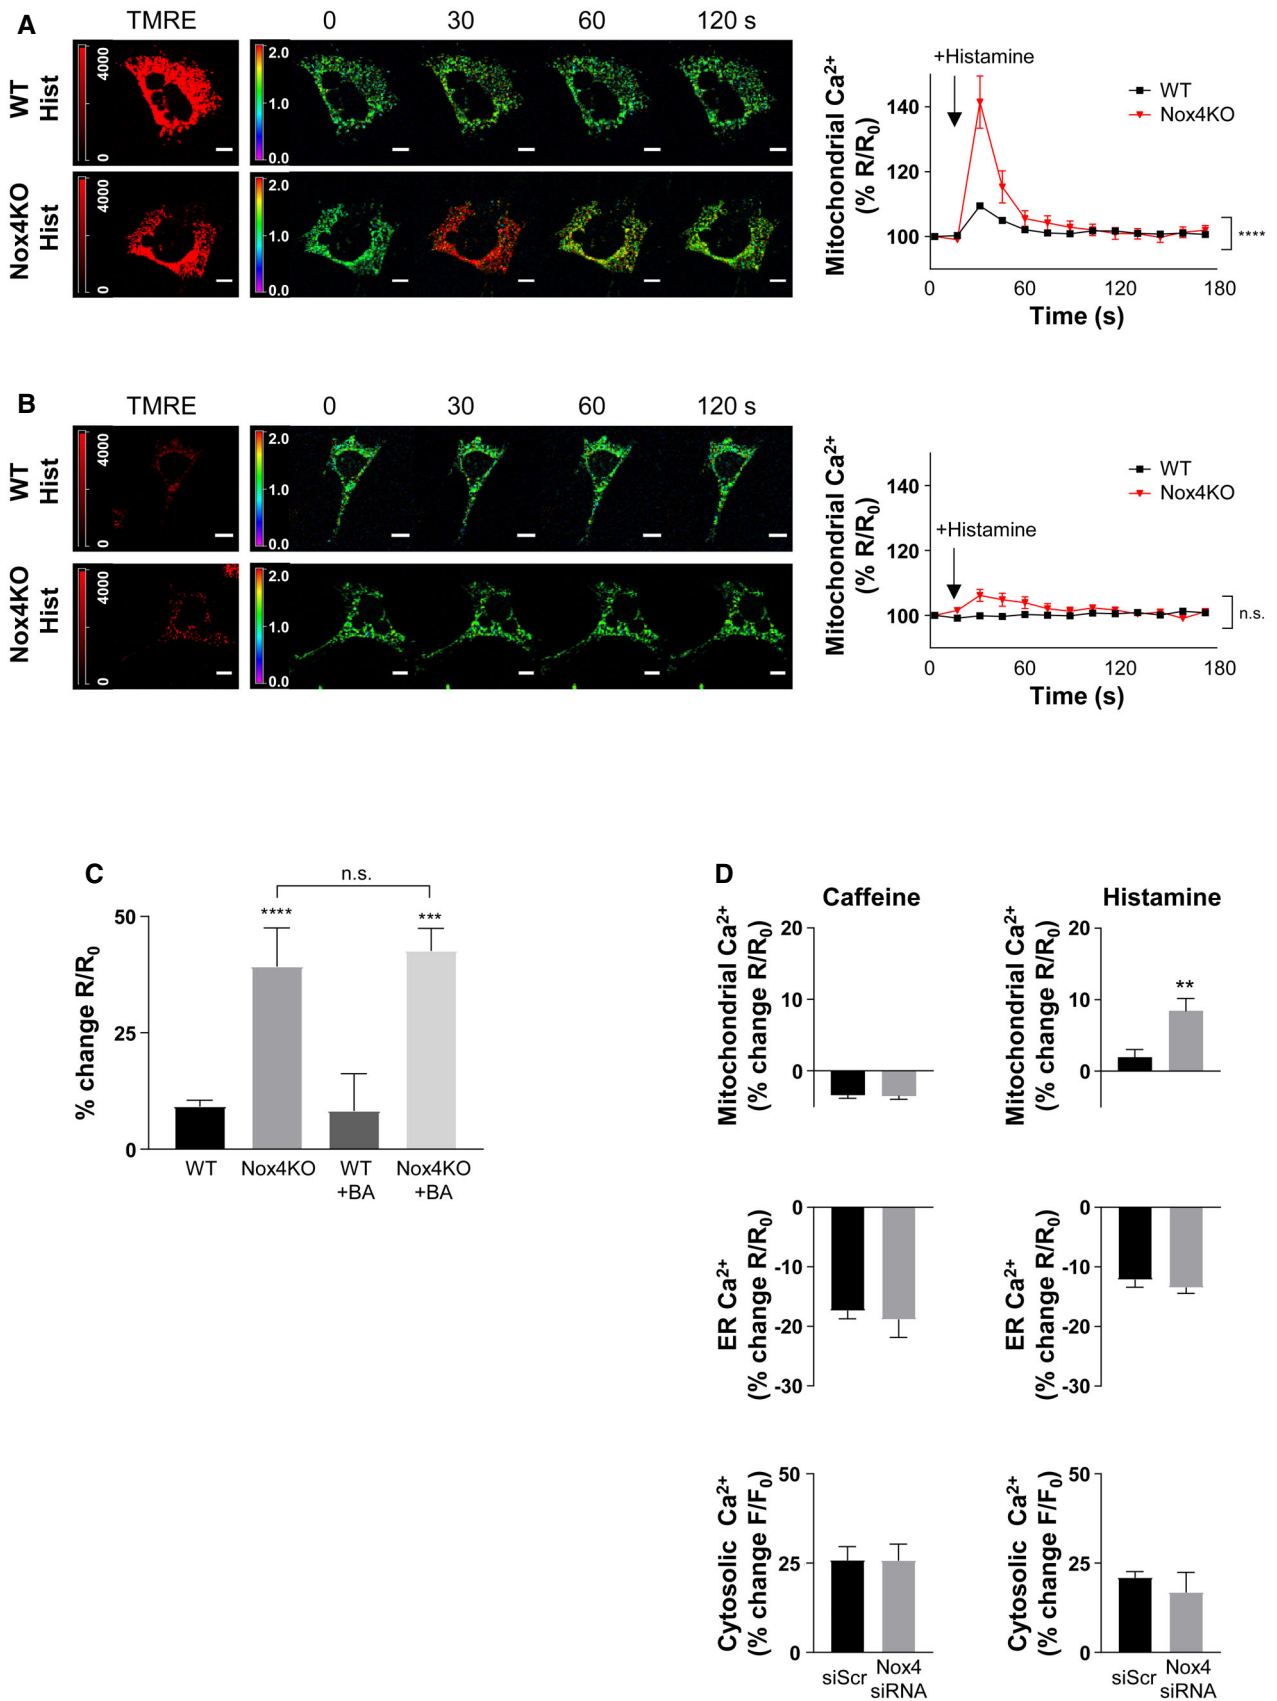

Figure EV2.

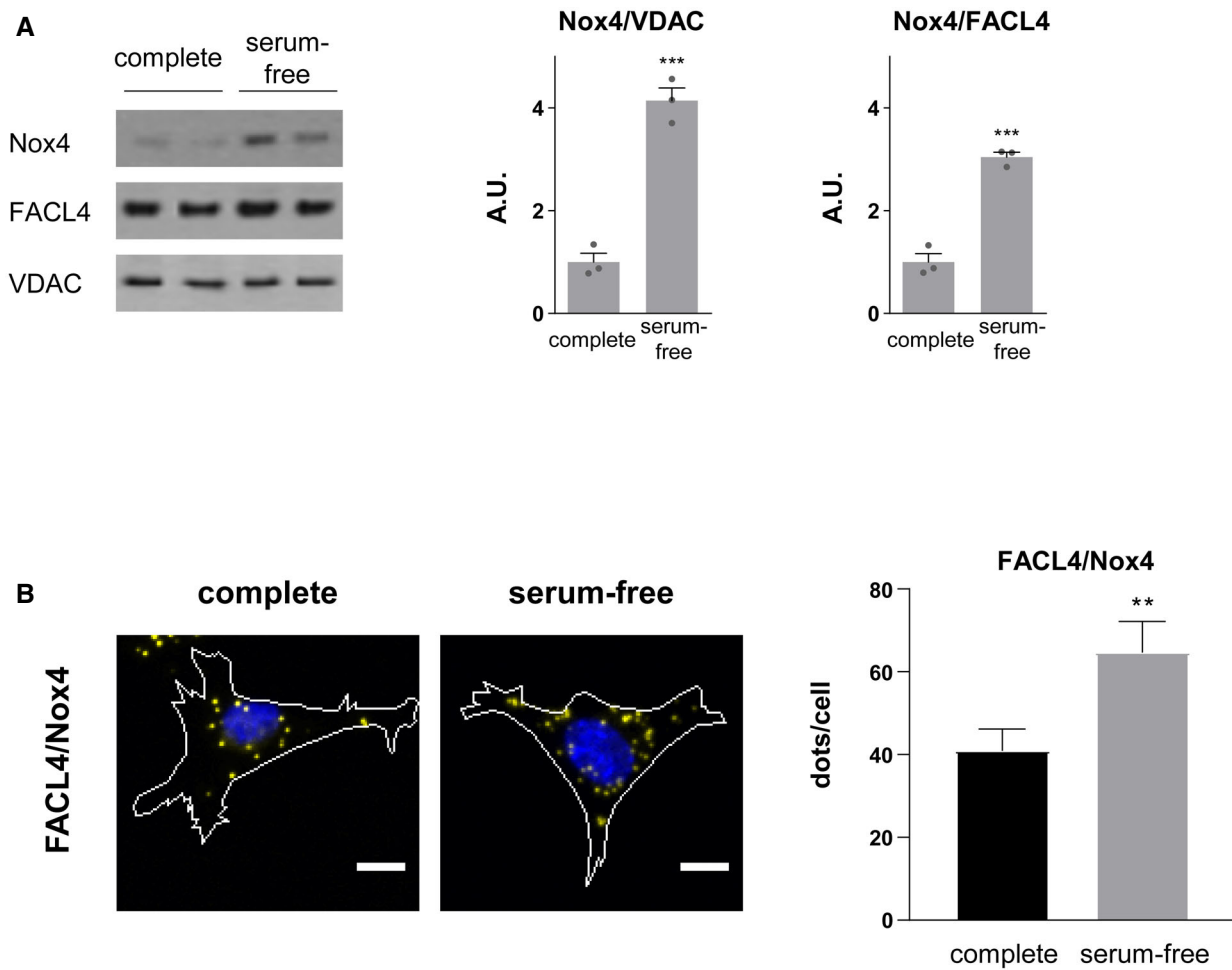

**Figure EV3. Effect of serum starvation on Nox4 levels at the MAM.**

A Effect of serum starvation on Nox4 protein levels in WT MEFs. FACL4 and VDAC used as MAM markers.  $n = 3/\text{group}$ .

B Simplified photomicrographs of proximity ligation studies in WT MEFs under serum-replete and serum-starved conditions (as in Fig 4). Nuclei are in blue, while yellow dots denote co-localization of proteins. Quantification of the number of dots/cell is shown to the right. Proximity was tested for FACL4/Nox4. Scale bars: 10  $\mu\text{m}$ .  $n = 3/\text{group}$  (with > 50 cells/individual experiment).

Data information: Data are mean  $\pm$  SEM. \*\* $P < 0.01$ ; \*\*\* $P < 0.001$  compared to control. Unpaired t-test.

Source data are available online for this figure.

**Figure EV4. Nox4 regulates serine/threonine phosphatase activity.**

- A Mitochondrial ROS levels in serum-starved WT and Nox4 KO MEFs indexed using a mitochondrial-targeted HyPer probe (Mito HyPer). Representative photomicrographs of the fluorescence ratio are shown to the left and mean data for changes in fluorescence ratio to the right. The corresponding ROS-insensitive SypHer probe was used to correct for any pH-induced changes in fluorescence.  $n = 3$  independent cell preparations/group, with at least 50 cells imaged/preparation. Scale bars: 10  $\mu\text{m}$ .
- B Effect of Mito-TEMPO on the phosphorylation of  $\text{InsP}_3\text{R}$  and Akt in serum-starved WT MEFs.  $\text{InsP}_3\text{R}$  was first immunoprecipitated and then the precipitate was immunoblotted for total  $\text{InsP}_3\text{R}$  and for the phosphorylated Akt substrate motif RXRXX(pS/T) (p- $\text{InsP}_3\text{R}$ ). FACL4 was used as a loading control for the MAM. Mean data shown to the bottom.  $n = 4/\text{group}$ .
- C Effect of Mito-TEMPO on histamine-induced changes in mitochondrial calcium in serum-starved cells. Representative images of YFP/CFP ratio are shown to the right.  $n = 3/\text{group}$  (with > 30 cells per individual experiment). Scale bars: 10  $\mu\text{m}$ .
- D Ser/Thr phosphatase activity measured in crude mitochondrial fractions of MEFs in the presence or absence of okadaic acid (OA, 10 nmol/l; specific for PP2a inhibition) or calyculin A (Caly, 60 nmol/l; which inhibits PP1 and PP2a) or  $\text{H}_2\text{O}_2$  (500  $\mu\text{mol/l}$ ). PP2a activity was calculated as the difference between control and OA, and PP1+PP2a activity as the difference between control and Caly.  $n = 5/\text{group}$ . \*\*\*\* $p < 0.0001$  compared to respective control; # $p < 0.05$ , ### $p < 0.001$ , #### $p < 0.0001$  comparing Nox4KO to respective WT group.
- E Effect of treatment of cells with PEG-catalase (Cat) or transfection of Nox4KO cells with active Nox4 or mutant Nox4<sup>P437H</sup> (Mut) on Ser/Thr phosphatase activity.  $n = 4/\text{group}$ . \*\*\* $p < 0.001$ , \*\*\*\* $p < 0.0001$  compared to WT control group; #### $p < 0.0001$  compared to Nox4KO group.

Data information: Data are mean  $\pm$  SEM. (A,B): unpaired t-test; (C): 2-way repeated measures ANOVA; (D, E): 1-way ANOVA.

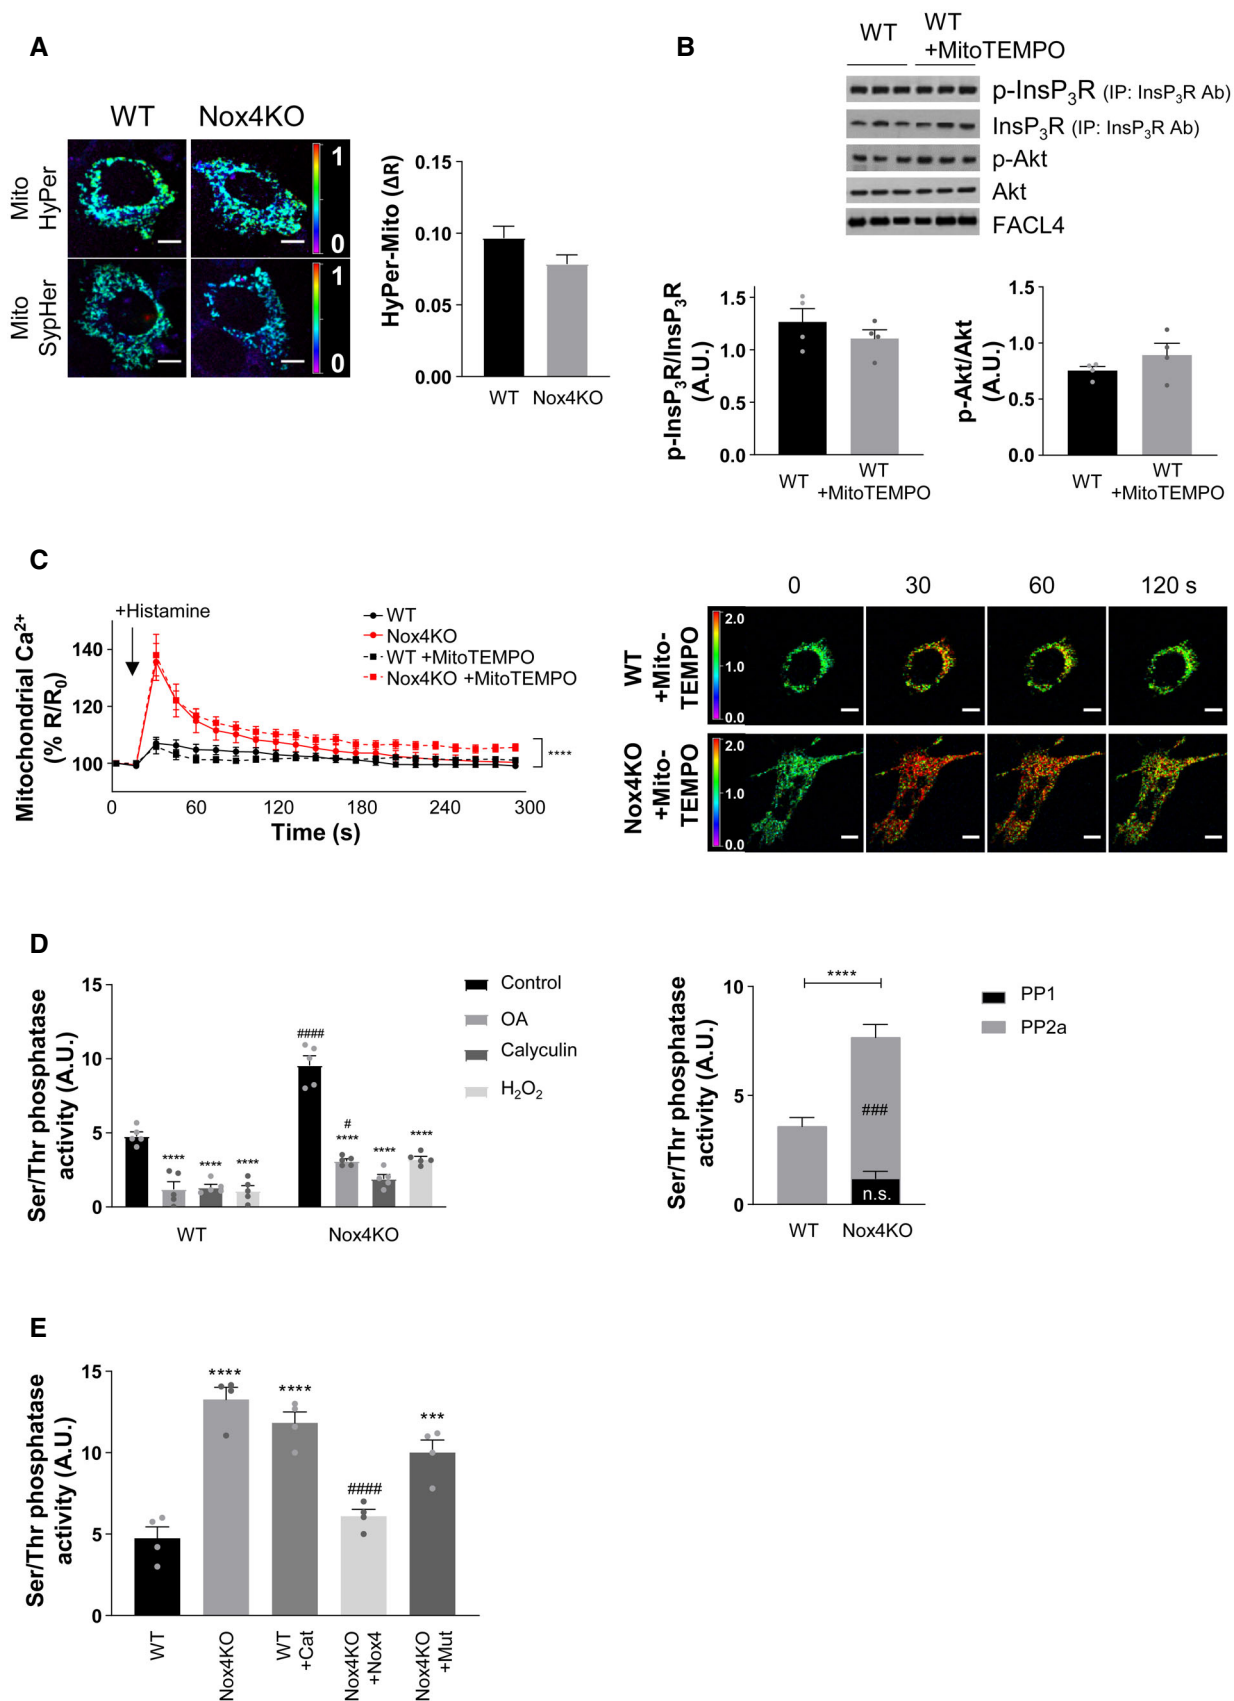

Figure EV4.

**Figure EV5. Functional effects of Nox4-dependent regulation of InsP<sub>3</sub>R.**

- A Changes in histamine-induced mitochondrial calcium levels in serum-starved WT and Nox4KO MEFs in the presence or absence of Akti or xestospongins C (XeC). Images show the YFP/CFP ratio at different time points. Relates to Fig 6C. Scale bars: 10  $\mu$ m.
- B Percentage of serum-starved cardiomyocytes with depolarized mitochondria in the absence or presence of XeC.  $n = 9$ /group.
- C Cell death in serum-starved cardiomyocytes depleted of Nox4 or control cells, in the absence or presence of XeC.  $n = 7$ /group.
- D Changes in histamine-induced mitochondrial calcium levels in serum-starved WT and Nox4KO MEFs in the presence or absence of okadaic acid, as in (A). Scale bars: 10  $\mu$ m.  $n = 3$ /group (with > 50 cells per individual experiment).
- E Cell death in serum-starved WT and Nox4KO MEFs in the presence or absence of okadaic acid.  $n = 5$ /group.
- F Indices of cardiac contractile function in perfused WT and Nox4KO hearts at baseline (Basal) and then after 25 min ischemia/30 min reperfusion (recovery). Hearts were treated with XeC (1  $\mu$ mol/l) or vehicle control for 20 min prior to ischemia. HR = heart rate;  $dP/dt_{max}$  and  $dP/dt_{min}$  = maximal rate of rise and fall, respectively, of left ventricular (LV) pressure; EDP = LV end-diastolic pressure.  $n = 6-7$ /group.

Data information: Data are mean  $\pm$  SEM. \* $P < 0.05$ ; \*\*\* $P < 0.001$ ; \*\*\*\* $P < 0.0001$  among compared groups or vs. control. # $P < 0.05$ , #### $P < 0.0001$  vs. Nox4KD or vehicle control. (B,C,E,F): 1-way ANOVA; (D): paired  $t$ -test.

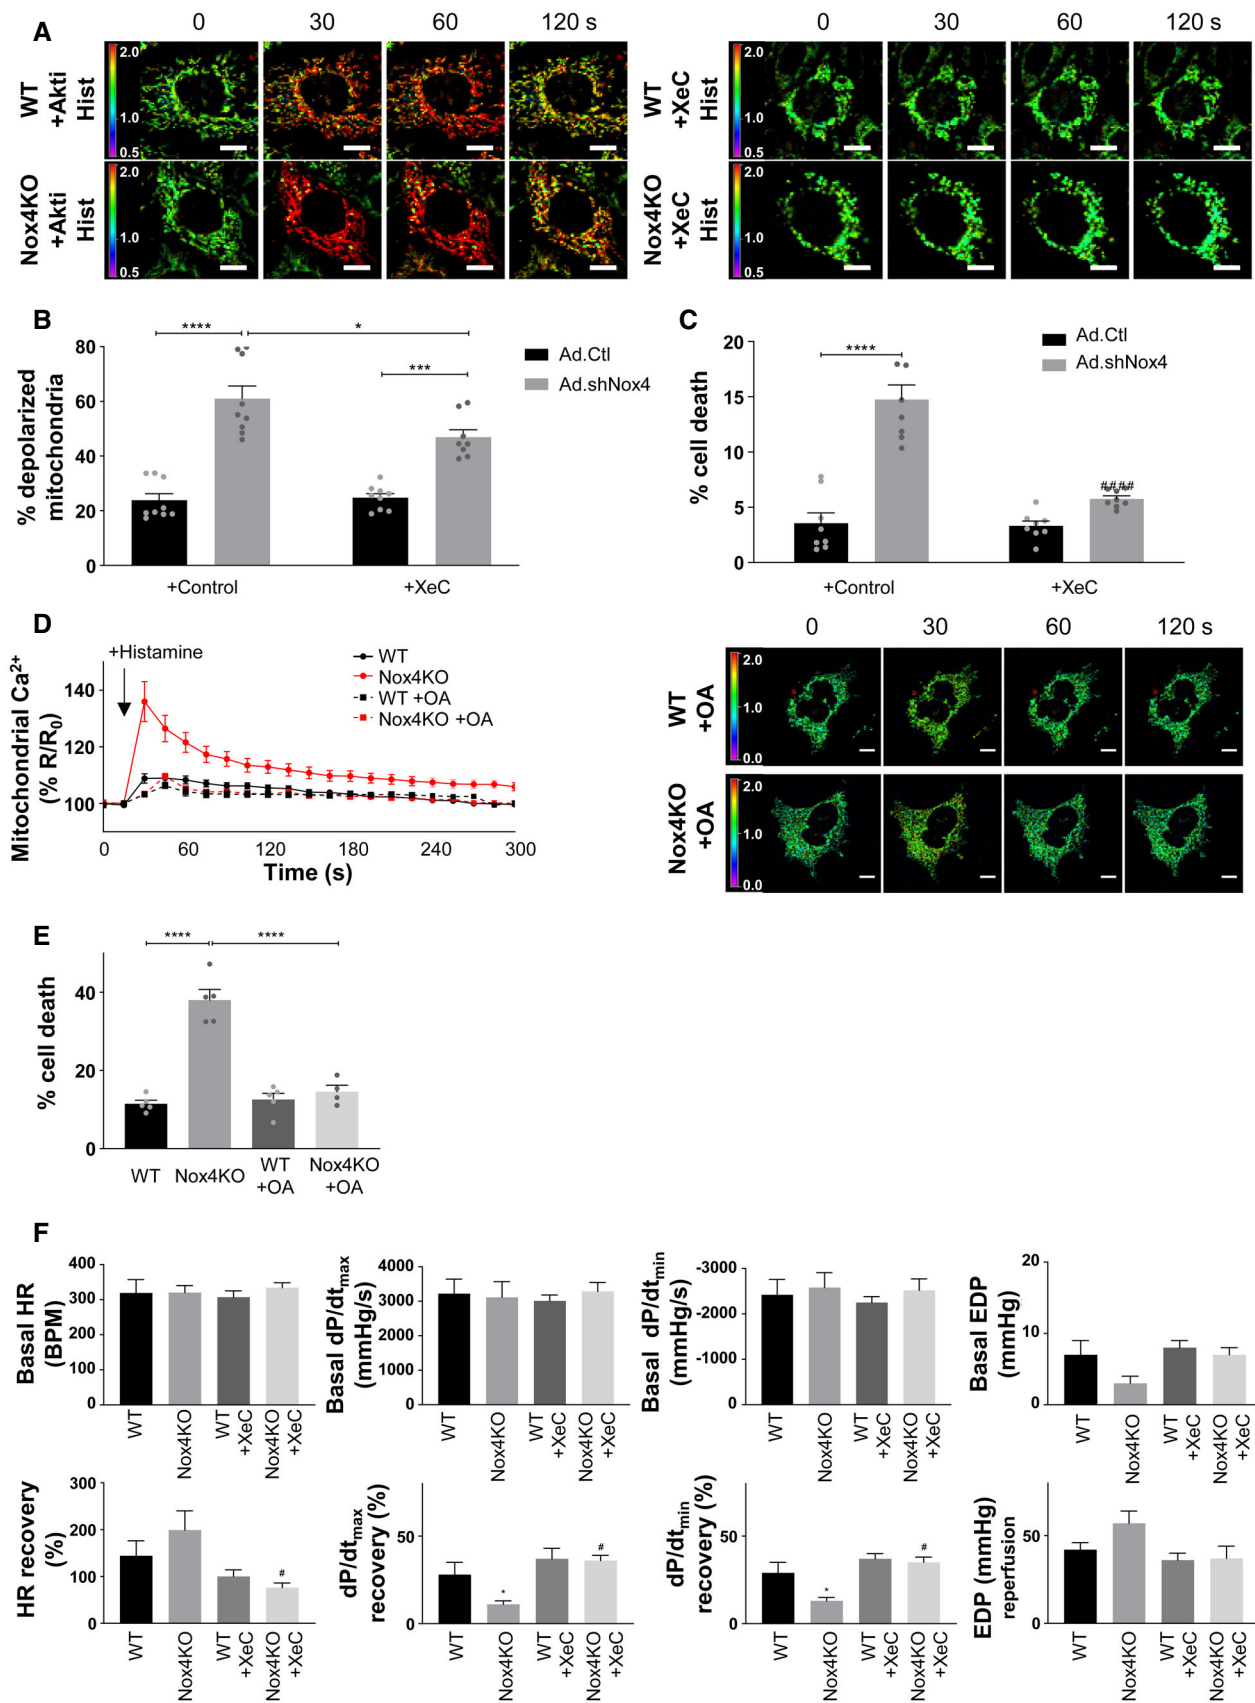

Figure EV5.
