# Supplementary material for: Nox4 regulates InsP3 receptor‐dependent Ca2+ release into mitochondria to promote cell survival
Source: PubMed Central journal article supplement (PMC7527947; doi:10.15252/embj.2019103530), 2020-08-10
Supplement: EMBJ-39-e103530-s007.pdf [file EMBJ-39-e103530-s007.pdf]

# Nox4 regulates InsP<sub>3</sub> receptor-dependent Ca<sup>2+</sup> release into mitochondria to promote cell survival

Matteo Beretta, Celio Santos, Chris Molenaar, Anne Hafstad, Christopher Miller, Aram Revazian, Kai Betteridge, Katrin Schröder, Katrin Streckfuß-Bömeke, James Doroshov, Roland Fleck, Tsung-Ping Su, Vsevelod Belousov, Maddy Parsons, and Ajay Shah

DOI: [10.15252/embj.2019103530](https://doi.org/10.15252/embj.2019103530)

*Corresponding author(s): Ajay Shah (ajay.shah@kcl.ac.uk)*

---

## Review Timeline:

|                     |             |
|---------------------|-------------|
| Submission Date:    | 22nd Sep 19 |
| Editorial Decision: | 28th Oct 19 |
| Revision Received:  | 11th Feb 20 |
| Editorial Decision: | 20th Mar 20 |
| Revision Received:  | 19th Apr 20 |
| Editorial Decision: | 19th May 20 |
| Revision Received:  | 22nd Jun 20 |
| Accepted:           | 1st Jul 20  |

---

*Editor: Elisabetta Argenzio*

## Transaction Report:

(Note: With the exception of the correction of typographical or spelling errors that could be a source of ambiguity, letters and reports are not edited. Depending on transfer agreements, referee reports obtained elsewhere may or may not be included in this compilation. Referee reports are anonymous unless the Referee chooses to sign their reports.)

Dear Dr. Shah,

Thank you for submitting your manuscript entitled "Nox4 regulates InsP3 receptor Ca<sup>2+</sup> release to mitochondria to promote cell survival" to The EMBO Journal. Your study has been sent to three referees for evaluation, whose reports are enclosed below.

As you can see, while the referees find the work potentially interesting, they also raise several key points that need to be addressed before they can support publication in The EMBO Journal. We find that all three reports are fair and balanced and require you to add new experimental data and controls, as well as appropriate quantifications and statistical analyses, in order to satisfy every request from the referees.

Given the overall interest of your study, I would like to invite you to revise the manuscript in response to the referee requests. I should also note that conclusively addressing all major and minor issues raised by the referees would be essential for publication in The EMBO Journal, as well as a strong support from the reviewers.

When preparing your letter of response to the referees' comments, bear in mind that this will form part of the Review Process File and will be available online to the community. For more details on our Transparent Editorial Process, please visit our website:  
[http://emboj.embopress.org/about#Transparent\\_Process](http://emboj.embopress.org/about#Transparent_Process)

We generally grant three months as standard revision time. As a matter of policy, competing manuscripts published during this period will not negatively impact on our assessment of the conceptual advance presented by your study. Nevertheless, please contact me as soon as possible upon publication of any related work.

I thank you again for the opportunity to consider this study for publication and will be happy to answer any questions about the submission of the revised manuscript to The EMBO Journal. I look forward to your revision.

Yours sincerely,

Elisabetta Argenzio, PhD  
Editor  
The EMBO Journal

Instructions for preparing your revised manuscript:

Please make sure you upload a letter of response to the referees' comments together with the revised manuscript.

Please also check that the title and abstract of the manuscript are brief, yet explicit, even to non-specialists.

When assembling figures, please refer to our figure preparation guideline in order to ensure proper formatting and readability in print as well as on screen:

<http://bit.ly/EMBOPressFigurePreparationGuideline>

IMPORTANT: When you send the revision we will require

- a point-by-point response to the referees' comments, with a detailed description of the changes made (as a word file).

- a word file of the manuscript text.

- individual production quality figure files (one file per figure)

- a complete author checklist, which you can download from our author guidelines (<https://www.embopress.org/page/journal/14602075/authorguide>).

- Expanded View files (replacing Supplementary Information)

Please see out instructions to authors

<https://www.embopress.org/page/journal/14602075/authorguide#expandedview>

Please remember: Digital image enhancement is acceptable practice, as long as it accurately represents the original data and conforms to community standards. If a figure has been subjected to significant electronic manipulation, this must be noted in the figure legend or in the 'Materials and Methods' section. The editors reserve the right to request original versions of figures and the original images that were used to assemble the figure.

Further information is available in our Guide For Authors:

<https://www.embopress.org/page/journal/14602075/authorguide>

The revision must be submitted online within 90 days; please click on the link below to submit the revision online before 26th Jan 2020.

Link Not Available

Please do not share this URL as it will give anyone who clicks it access to your account.

-----

Referee #1:

In this manuscript the authors studied on the mechanism by which Nox4 protect cells from regulated cell death. Based on their findings the authors conclude that Nox4 is localized at the MAM where it generates ROS at the specific and restricted compartment of the MAM. ROS serves to inhibit PP2a to increase the level of p-Akt and the activated kinase phosphorylates and inhibits the activity of IP3 receptors at the MAM. This in turn restricts Ca<sup>2+</sup> influx into the mitochondria to prevent opening of the mitochondrial permeability transition pore and cell death.

The topic is of high interest and the finding that Nox4 functions at the MAM to control mitochondrial Ca<sup>2+</sup> load through phosphorylation of IP3 receptors and cell death is significant. In general, the findings support the major conclusion but stop short of fully establishing the functioning of the pathway under rest and stimulated conditions. This should be examined by additional experiments before further considerations.

1. Figure 2: The authors should use the cardiomyocytes in panel A to determine the effect of SR Ca<sup>2+</sup> release by receptor stimulation and by caffeine to determine whether knockdown of Nox4 affect mitochondrial Ca<sup>2+</sup> influx in cardiomyocytes.
2. Figure 2I: It is not clear why the Nox4 mutant partially restores mitochondrial Ca<sup>2+</sup> influx and some of the other Nox4 effect. One possibility is the Nox4 also functions as a tether at the MAM. This should be examined by determining whether expression of Nox4 and its inactive mutant in Nox4 knockout cells increases the number of MAM. This can be done by EM (Figure 3) and/or proximity assay and/or coimmunoprecipitation of ER and mitochondrial proteins in the MAM.
3. Figure 3 A-C and Figure 5 A, B: It is important to show whether cell stimulation affect the level of Nox4 in the MAM either using the same fractionation in stimulated cells and determining the effect of cell stimulation on coimmunoprecipitation of Nox4 with FACL4 and the IP3 receptors.
4. The results in Figure 3D should be quantified in multiple images.
5. The experiments in Figure 4 should be performed in resting and stimulated cells. The experiments in comments 3-5 should determine if cell stimulation further recruits Nox4 to the MAM.
6. It is surprising that the important results in Figure S5 were relegated to the supplement. This Figure, or at least panels B-D, F should be moved to the main text.

Referee #2:

The paper by Beretta et al. describes a new role for NOX4 in the regulation of cell death. They showed that NOX4 is located at Mitochondria-associated Membranes (MAMs), where it regulates the phosphorylation status of IP3Rs and Ca<sup>2+</sup> efflux in an Akt-dependent manner, by modulating the amount of H<sub>2</sub>O<sub>2</sub> exclusively at MAMs. The relevance of this molecular pathway is confirmed by in vivo experiments upon I/R injury. The authors conclude that this NOX4-dependent stress pathway protects against necrosis through spatially delimited redox signaling at the MAM to inhibit the Ca<sup>2+</sup> release activity of IP3R.

Although the paper is new and interesting, several serious issues undermine confidence in these conclusions.

NOX4 depletion increased Ca<sup>2+</sup> release from the ER with consequent high mitochondrial Ca<sup>2+</sup> accumulation (Fig. 2). However, no differences in cytosolic Ca<sup>2+</sup> levels have been detected. This is not easy to understand since enhanced Ca<sup>2+</sup> efflux from the ER should result in higher cytosolic [Ca<sup>2+</sup>]. How can the authors account for such divergent findings?

In Figs 5-6, NOX4-KO cells displayed very low levels of phospho-IP3R, but the aminoacidic residue that is targeted by the phosphorylation event is not indicated. M&M section reported a phospho-IP3R antibody purchased by Cell Signalling Tech. Searching this Ab in the CST website, I found only one phospho-IP3R antibody, which recognizes SER 1756. Is the same Ab used in the manuscript? If so, some problems exist i) cAMP-dependent protein kinase (PKA), not Akt, is the kinase responsible for the phosphorylation at Ser1756. Akt phosphorylates IP3Rs at the C-term; ii) Phosphorylation on Ser1756 is specific for type 1 IP3R since IP3R2 and IP3R3 lack this consensus PKA phosphorylation site. Of note, the authors have analyzed only IP3R3, which is enriched at MAMs; iii) Additional studies established that PKA phosphorylation of IP3R1 increases, rather than decreases, IP3-induced Ca<sup>2+</sup> release by approximately 2-fold (Nakade S. et al., JBC 1994; Gomez L. et al., CDDis

2016). Together, all these issues arise doubts on the molecular mechanism presented here. In Fig. 5, NOX4 depletion abolished ROS production only at MAMs but not in the cytosol. However, H<sub>2</sub>O<sub>2</sub> freely and rapidly pass the membranes to diffuse inside the whole cell; thus I expected a reduction of H<sub>2</sub>O<sub>2</sub> levels also in the cytosol. In Fig. 3A-B-C MAMs fractions appear not enriched for typical MAM markers FACL4, SIGMA 1R and calnexin

Referee #3:

The manuscript by Beretta et al. analyzes the protective role of Nox4 in counteracting necrotic cell death upon stress -either serum starvation in cells or I/R injury in hearts. The authors propose that NOX-dependent production of ROS at MAMs is required for Akt activation, InsP3R phosphorylation and, as a consequence, for ER-mitochondria Calcium transfer reduction which, in stress conditions, would prevent mitochondrial calcium overload, loss of mitochondrial membrane potential (MMP) and cell death.

Major:

In general, the study is quite well designed and experiments are rigorously performed, however, I have one major concern that must be addressed. The authors show that Ad-shNox4 or Nox4KO cells when serum-starved for 48 hours are subjected to a) cell death, b) loss of MMP (figure 1), but still their mitochondria take up more calcium than wt controls when treated with an InsP3-generating agonist (figure 2). This is against the thermodynamics properties of mitochondrial calcium uptake, which occurs only in energized mitochondria and strictly depends on the MMP. The notion of mitochondrial calcium overload, which may occur upon pathological triggers and eventually result in PTP-dependent cell death, differs from that of mitochondrial calcium uptake that, as said, occurs only in energized mitochondria. Thus, the mitochondrial calcium traces of figure 2 could have been recorded only from cells with polarized mitochondria and not from a depolarized cell population. To clarify this point, the authors should simultaneously detect TMRE-positive and mitochondria-targeted Cameleon positive cells, and distinguish agonist-induced mitochondrial calcium uptake traces of TMRE-positive from TMRE-negative cells.

Other major concerns:

On top of this, since the authors claim that inhibition of the PTP by CsA treatment is protective against serum depletion-induced death of Nox4KO cells, mitochondrial calcium traces in TMRE+ and TMRE- cells should be additionally performed in the presence or absence of CsA.

Is the mitochondrial calcium uptake increase upon Nox4 deletion due to decreased ROS production? Measurements of mitochondrial calcium uptake in catalase treated cells (incubation time with catalase according to fig 2I and 5C) should be performed.

The authors show that Nox4 is required for ROS production at MAMs. However, in view of the involvement of mitochondria in the process and the important role played by mitochondria in ROS production, the authors should analyze whether mitochondrial-derived ROS are also involved. For this purpose, in serum-starved wt cells, mitochondrial ROS should be measured by means of the mitoHyPer probe. In addition, they should analyze the effects of a mitochondria-targeted antioxidant (e.g. MitoTEMPO) on a) phosphorylation of Akt and InsP3R; b) H<sub>2</sub>O<sub>2</sub> measured by FACL4Hyper; c) mitochondrial calcium uptake.

In figure 6, the role of InsP3R by XeC treatment is well determined. Less clear is the role of Akt. Indeed, the use of an Akt inhibitor on top of Nox4 deletion is not very informative. The authors should show that increased Akt activity (e.g. by overexpression of a constitutively active Akt expression vector or a similar strategy) rescues mitochondrial calcium levels and cell viability in

Nox4KO cells.

Minor:

Why are the effects of Nox4 deletion evident only in stress conditions? Nox4 protein is present also in 15% serum although at lower levels compared to serum-free conditions. Which is the activity level of Nox4 in serum-repleted conditions? ROS (particularly MAM-localized ROS) should be measured in serum-repleted conditions in the presence/absence of Nox4.

Figure S1B: what is represented here compared to fig. 1C?

Figure S4: does catalase increase Ser/Thr phosphatase activity similarly to Nox4 deletion? Is phosphatase activity rescued in Nox4KO cells upon wtNox4 or Nox4mut expression?

**Beretta et al: Nox4 regulates InsP<sub>3</sub> receptor Ca<sup>2+</sup> release to mitochondria to promote cell survival. EMBOJ 2019\_103530**

We thank the referees for the positive reviews and the helpful comments and suggestions all of which we hope we have addressed in this revision. A point-by-point response is provided below.

**Referee #1:**

*1. Figure 2: The authors should use the cardiomyocytes in panel A to determine the effect of SR Ca<sup>2+</sup> release by receptor stimulation and by caffeine to determine whether knockdown of Nox4 affect mitochondrial Ca<sup>2+</sup> influx in cardiomyocytes.*

We performed this experiment and the results are shown in new Fig EV2 D and described on page 8 para 1. They show that an increased mitochondrial calcium influx in cardiomyocytes after Nox4 knockdown is observed after histamine but not caffeine stimulation. This is consistent with the notion that Nox4 specifically modulates flux through InsP<sub>3</sub>R at the MAM and does not directly affect ER/SR calcium release through other channels (RyR).

*2. Figure 2I: It is not clear why the Nox4 mutant partially restores mitochondrial Ca<sup>2+</sup> influx and some of the other Nox4 effect. One possibility is the Nox4 also functions as a tether at the MAM. This should be examined by determining whether expression of Nox4 and its inactive mutant in Nox4 knockout cells increases the number of MAM. This can be done by EM (Figure 3) and/or proximity assay and/or coimmunoprecipitation of ER and mitochondrial proteins in the MAM.*

We performed proximity ligation assays (PLA) in Nox4 KO cells transfected with functional Nox4 or Nox4<sup>P437H</sup>. These studies showed that there was no change in the MAM as assessed by the FAC14/InsP3R signal. The results are shown in Appendix Fig S4H and described on page 10 para 1.

*3. Figure 3 A-C and Figure 5 A, B: It is important to show whether cell stimulation affect the level of Nox4 in the MAM either using the same fractionation in stimulated cells and determining the effect of cell stimulation on coimmunoprecipitation of Nox4 with FAC14 and the IP3 receptors.*

We now show that Nox4 levels at the MAM are increased after serum starvation – new Fig EV3 and Results Page 9 para 1.

*4. The results in Figure 3D should be quantified in multiple images.*

We quantified from multiple images the proportion of Nox4 or FAC14 labeled at the MAM versus any other location in the cell. The results are shown in new Fig S3 and confirm a predominant MAM location.

*5. The experiments in Figure 4 should be performed in resting and stimulated cells. The experiments in comments 3-5 should determine if cell stimulation further recruits Nox4 to the MAM.*

This new experiment is shown in Fig EV3 B and reported on page 9 last para. It confirms an increase in Nox4 at the MAM after serum starvation. Please also see response to point 3 above.

*6. It is surprising that the important results in Figure S5 were relegated to the supplement. This Figure, or at least panels B-D, F should be moved to the main text.*

We have now placed these results in the new Expanded View Figure EV5 which forms part of the main manuscript.

**Referee #2:**

*NOX4 depletion increased Ca<sup>2+</sup> release from the ER with consequent high mitochondrial Ca<sup>2+</sup> accumulation (Fig. 2). However, no differences in cytosolic Ca<sup>2+</sup> levels have been detected. This is not easy to understand since enhanced Ca<sup>2+</sup> efflux from the ER should result in higher cytosolic [Ca<sup>2+</sup>]. How can the authors account for such divergent findings?*

Our results suggest that Nox4 modulates efflux through InsP<sub>3</sub>R specifically at the MAM (because Nox4 is located there). Therefore, it only modulates that part of the calcium released from the ER that is released at the MAM. We do see increases in cytosolic calcium after histamine or ATP (Fig 2G-H) but these are not significantly affected by Nox4 because it only affects the calcium release at the MAM. This is further supported by the new experiments performed in response to point 1 from reviewer 1 (new Fig EV2 D) which show that caffeine-induced calcium release in cardiomyocytes is not affected by Nox4.

*In Figs 5-6, NOX4-KO cells displayed very low levels of phospho-IP3R, but the aminoacidic residue that is targeted by the phosphorylation event is not indicated. M&M section reported a phospho-IP3R antibody purchased by Cell Signalling Tech. Searching this Ab in the CST website, I found only one phospho-IP3R antibody, which recognizes SER 1756. Is the same Ab used in the manuscript? If so, some problems exist i) cAMP-dependent protein kinase (PKA), not Akt, is the kinase responsible for the phosphorylation at Ser1756. Akt phosphorylates IP3Rs at the C-term; ii) Phosphorylation on Ser1756 is specific for type 1 IP3R since IP3R2 and IP3R3 lack this consensus PKA phosphorylation site. Of note, the authors have analyzed only IP3R3, which is enriched at MAMs; iii) Additional studies established that PKA phosphorylation of IP3R1 increases, rather than decreases, IP3-induced Ca<sup>2+</sup> release by approximately 2-fold (Nakade S. et al., JBC 1994; Gomez L. et al., CDDis 2016). Together, all these issues arise doubts on the molecular mechanism presented here.*

The referee raises an important point. We previously used an Ab which we believe detected Akt-mediated phosphorylation based on the results of complete inhibition of InsP<sub>3</sub>R phosphorylation by Akti. However, we have now repeated these experiments by studying InsP<sub>3</sub>R phosphorylation with a different approach. We have now immunoprecipitated InsP<sub>3</sub>R and then immunoblotted with a monoclonal Ab against the phosphorylated Akt-substrate motif RXX(pS/T) (Cell Signaling 23C8D2; mAb #10001) as in Khan et al., 2006 – please see Appendix Fig S5A. The overall results of these studies are similar to those in the previous version.

*In Fig. 5, NOX4 depletion abolished ROS production only at MAMs but not in the cytosol. However, H<sub>2</sub>O<sub>2</sub> freely and rapidly pass the membranes to diffuse inside the whole cell; thus I expected a reduction of H<sub>2</sub>O<sub>2</sub> levels also in the cytosol.*

Actually, specific redox signaling generally depends critically upon spatially confined ROS signals which are achieved through several mechanisms including (a) localised low level ROS production in subcellular compartments and (b) very high cellular capacity to degrade ROS through molecules such as GSH and peroxiredoxin. This means that even though H<sub>2</sub>O<sub>2</sub> is considered to be highly diffusible, in practice its effects are restricted close to the site of endogenous production unless the level of production is so high that it overwhelms cellular antioxidant systems. Therefore, it is not surprising that Nox4-dependent ROS production at the MAM does not affect ROS levels in other cellular locations. For detailed reviews on this topic please see, for example, D'Autre'aux & Toledano, 2007; Winterbourn 2013.

D'Autre'aux B, Toledano MB (2007) ROS as signalling molecules: mechanisms that generate specificity in ROS homeostasis. Nat Rev Mol Cell Biol 8:813 – 824.

Winterbourn CC (2013) The biological chemistry of hydrogen peroxide. Methods Enzymol. 528:3-25.



*In Fig. 3A-B-C MAMs fractions appear not enriched for typical MAM markers FACL4, SIGMA 1R and calnexin*

As far as we can see, we think these figures show an enrichment of the MAM markers (VDAC, calnexin, Sigma1R, FACL4) in the MAM fraction (lane 6) and in the crude ER fraction which includes MAM (lane 3), unless we are missing something.

**Referee #3:**

*Major:*

*In general, the study is quite well designed and experiments are rigorously performed, however, I have one major concern that must be addressed. The authors show that Ad-shNox4 or Nox4KO cells when serum-starved for 48 hours are subjected to a) cell death, b) loss of MMP (figure 1), but still their mitochondria take up more calcium than wt controls when treated with an InsP3-generating agonist (figure 2). This is against the thermodynamics properties of mitochondrial calcium uptake, which occurs only in energized mitochondria and strictly depends on the MMP. The notion of mitochondrial calcium overload, which may occur upon pathological triggers and eventually result in PTP-dependent cell death, differs from that of mitochondrial calcium uptake that, as said, occurs only in energized mitochondria. Thus, the mitochondrial calcium traces of figure 2 could have been recorded only from cells with polarized mitochondria and not from a depolarized cell population. To clarify this point, the authors should simultaneously detect TMRE-positive and mitochondria-targeted Cameleon positive cells, and distinguish agonist-induced mitochondrial calcium uptake traces of TMRE-positive from TMRE-negative cells.*

We have performed the experiment suggested by the referee (new Fig EV2 A-B). This clearly shows that the enhanced histamine-induced mitochondrial calcium uptake in Nox4-deficient cells is observed only in TMRE+ cells (panel A) and not in TMRE- cells (panel B). These results are now described on page 8 para 1. Please note that the calcium experiments were done after 24 h serum starvation which is now clarified in the methods (page 22).

*On top of this, since the authors claim that inhibition of the PTP by CsA treatment is protective against serum depletion-induced death of Nox4KO cells, mitochondrial calcium traces in TMRE+ and TMRE- cells should be additionally performed in the presence or absence of CsA.*

We checked if the increased mitochondrial uptake in Nox4-deficient cells involved the mPTP by performing experiments in the presence or absence of bongrelic acid. We used this inhibitor rather than cyclosporin A because the latter is reported to also inhibit calcium uptake independent of the mPTP (Montero et al., 2004). Bongrelic acid had no effect on mitochondrial calcium uptake (new Fig EV2 C and Results page 8 para 1) but it did inhibit cell death (new Fig S1E)

Montero, M., et al., (2004) Calcineurin-independent inhibition of mitochondrial Ca<sup>2+</sup> uptake by cyclosporin A. Br J Pharmacol 141, 263-268.

*Is the mitochondrial calcium uptake increase upon Nox4 deletion due to decreased ROS production? Measurements of mitochondrial calcium uptake in catalase treated cells (incubation time with catalase according to fig 2I and 5C) should be performed.*

This experiment is shown in Fig 2I (third column). Catalase treatment does indeed result in an increase in mitochondrial calcium uptake.

*The authors show that Nox4 is required for ROS production at MAMs. However, in view of the involvement*

*of mitochondria in the process and the important role played by mitochondria in ROS production, the authors should analyze whether mitochondrial-derived ROS are also involved. For this purpose, in serum-starved wt cells, mitochondrial ROS should be measured by means of the mitoHyPer probe. In addition, they should analyze the effects of a mitochondria-targeted antioxidant (e.g. MitoTEMPO) on a) phosphorylation of Akt and InsP<sub>3</sub>R; b) H<sub>2</sub>O<sub>2</sub> measured by FACLSHyper; c) mitochondrial calcium uptake.*

As suggested, we assessed ROS levels in the mitochondria using mito-targeted HyPer probes but found no difference between WT and Nox4 KO cells (new Fig EV4 A). The treatment of WT cells with Mito-TEMPO had no effect on the level of phosphorylation of Akt or InsP<sub>3</sub>R (new Fig EV4 B). Mito-TEMPO also had no significant effect on the histamine-induced increase in mitochondrial calcium uptake (new Fig EV 4C). These results suggest that mitochondrial ROS do not contribute significantly to the effects reported in this study. These data are described in the Results page 11, para 2.

*In figure 6, the role of InsP<sub>3</sub>R by XeC treatment is well determined. Less clear is the role of Akt. Indeed, the use of an Akt inhibitor on top of Nox4 deletion is not very informative. The authors should show that increased Akt activity (e.g. by overexpression of a constitutively active Akt expression vector or a similar strategy) rescues mitochondrial calcium levels and cell viability in Nox4KO cells.*

We have performed new experiments using okadaic acid to inhibit phosphatase activity and thereby enhance Akt activation. Okadaic acid significantly increased both Akt and InsP<sub>3</sub>R phosphorylation in Nox4 KO cells (new Appendix Fig S6B). Okadaic acid also reduced the histamine-induced increase in mitochondrial calcium levels and cell death in serum-starved Nox4 KO cells (new Fig EV5 D-E). These data are presented in the Results page 12 second para.

*Minor:*

*Why are the effects of Nox4 deletion evident only in stress conditions? Nox4 protein is present also in 15% serum although at lower levels compared to serum-free conditions. Which is the activity level of Nox4 in serum-repleted conditions? ROS (particularly MAM-localized ROS) should be measured in serum-repleted conditions in the presence/absence of Nox4.*

We assessed the MAM-localized ROS signal under serum-replete conditions and the results are shown in Appendix Fig S5C and reported on page 11, para 2. We observed a higher MAM-located ROS signal in WT versus Nox4 KO cells but the magnitude was lower than under serum-deficient conditions. The fact that functional effects are only observed under stress conditions is likely to be because: (a) the target for Nox4 effects (i.e. Akt activation and InsP<sub>3</sub>R phosphorylation) is activated in response to stress (b) the amount of Nox4 and Nox4-mediated ROS production goes up during stress.

*Figure S1B: what is represented here compared to fig. 1C?*

This showed essentially the same information but using trypan blue exclusion. We have now deleted this panel.

*Figure S4: does catalase increase Ser/Thr phosphatase activity similarly to Nox4 deletion? Is phosphatase activity rescued in Nox4KO cells upon wtNox4 or Nox4mut expression?*

We performed additional experiments to test this question. The results (new Fig EV4E and page 12 para 1) show that incubation of serum-starved WT cells with PEG-catalase resulted in a significant increase in phosphatase activity. In Nox4 KO cells transfected with functional Nox4, the serine/threonine phosphatase activity was decreased whereas transfection with Nox4P437H had no significant effect.

Dear Dr. Shah,

Thank you for submitting a revised version of your manuscript. It has now been seen by the original referees, whose comments are shown below.

As you will see, while referee #1 and 3 find that their criticisms have been sufficiently addressed and recommend the manuscript for publication, reviewer #2 feels that his/her doubts on the molecular mechanism persist. In addition, s/he points to inconsistencies in the results.

We agree with referee #2 that these are important points that have to be addressed before pursuing publication of this manuscript and would thus invite you to address these remaining issues.

I look forward to your revision.

Yours sincerely,

Elisabetta Argenzio, PhD  
Editor  
The EMBO Journal

Instructions for preparing your revised manuscript:

Please make sure you upload a letter of response to the referees' comments together with the revised manuscript.

Please also check that the title and abstract of the manuscript are brief, yet explicit, even to non-specialists.

When assembling figures, please refer to our figure preparation guideline in order to ensure proper formatting and readability in print as well as on screen:  
<http://bit.ly/EMBOPressFigurePreparationGuideline>

**IMPORTANT:** When you send the revision we will require

- a point-by-point response to the referees' comments, with a detailed description of the changes made (as a word file).
- a word file of the manuscript text.
- individual production quality figure files (one file per figure)
- a complete author checklist, which you can download from our author guidelines (<https://www.embopress.org/page/journal/14602075/authorguide>).
- Expanded View files (replacing Supplementary Information)

Please see out instructions to authors

<https://www.embopress.org/page/journal/14602075/authorguide#expandedview>

Please remember: Digital image enhancement is acceptable practice, as long as it accurately represents the original data and conforms to community standards. If a figure has been subjected to significant electronic manipulation, this must be noted in the figure legend or in the 'Materials and Methods' section. The editors reserve the right to request original versions of figures and the original images that were used to assemble the figure.

Further information is available in our Guide For Authors:  
<https://www.embopress.org/page/journal/14602075/authorguide>

The revision must be submitted online within 90 days; please click on the link below to submit the revision online before 18th Jun 2020.

Link Not Available

Please do not share this URL as it will give anyone who clicks it access to your account.

-----  
Referee #1:

The authors addressed all of my concerns and the m/s is ready for publication in the EMBO journal.

Referee #2:

Although the new version of the manuscript by Beretta et al. appears ameliorated, the authors' reply to my queries failed to convince me.

In particular, the authors state that they used a new Ab for the recognition of Akt-mediated phosphorylation on IP3R. However, the phosphor-Akt substrates antibody can be used only upon immunoprecipitation of the target protein. So, it is not easy to understand the results showed in Figs. 5C, 6F and Appendix S5B, which are annotated as "Immunoblots for phosphorylated and total Akt and InsP3R in crude mitochondrial fractions", and not as IP exps. Again, the data in Appendix Fig. S5A simply demonstrated that in basal condition, the IP3R (type 3?) is phosphorylated by Akt. Nevertheless, the authors do not clarify the Ab used in the first version of the paper. If it is the phosphor-IP3R1 (Ser1756) antibody (PKA-dependent phosphorylation), the previous data cannot be ignored, and the role of PKA should be considered. Therefore, all my doubts about the molecular mechanism still persist.

In fig. 2E-F the authors showed that in NOX4 KO Mefs displayed increased total Ca<sup>2+</sup> release from the ER through the IP3R. This MUST reflect a higher cytosolic Ca<sup>2+</sup> increase, not only mitochondrial (unless there are some parallel compensatory mechanisms inside the cytosol). Thus, the idea that Nox4 only affects the calcium release at the MAM is at odds with the alteration of global ER Ca<sup>2+</sup> efflux.

Referee #3:

The authirs responded to all my questions

Beretta et al. Nox4 regulates InsP<sub>3</sub> receptor Ca<sup>2+</sup> release to mitochondria to promote cell survival.

### **Response to Referee #2**

Thank you for these further comments. A point by point response and a description of the changes made to the manuscript is provided below. We hope that this addresses the main issues and the paper is now considered suitable for publication.

***Although the new version of the manuscript by Beretta et al. appears ameliorated, the authors' reply to my queries failed to convince me.***

***In particular, the authors state that they used a new Ab for the recognition of Akt-mediated phosphorylation on IP3R. However, the phosphor-Akt substrates antibody can be used only upon immunoprecipitation of the target protein. So, it is not easy to understand the results showed in Figs. 5C, 6F and Appendix S5B, which are annotated as "Immunoblots for phosphorylated and total Akt and InsP3R in crude mitochondrial fractions", and not as IP exps. Again, the data in Appendix Fig. S5A simply demonstrated that in basal condition, the IP3R (type 3?) is phosphorylated by Akt.***

Response: We did actually perform immunoprecipitation for InsP<sub>3</sub>R-type 3 and then immunoblotting for the phosphorylated Akt-substrate motif RXRXX(pS/T) in all the above experiments, exactly as the reviewer indicates should be done. This was stated both in the revised text and the Methods. However, we have now further emphasised this point by (1) stating this in the legends to new Figs 5C, 6F EV4 B and Appendix S5B; (2) annotating these figures as shown in the example below to make this very clear; (3) making the description in the Methods (**page 20, bottom**) even more explicit. [Figures for referees not shown.]

***Nevertheless, the authors do not clarify the Ab used in the first version of the paper. If it is the phosphor-IP3R1 (Ser1756) antibody (PKA-dependent phosphorylation), the previous data cannot be ignored, and the role of PKA should be considered. Therefore, all my doubts about the molecular mechanism still persist.***

Response: The previous Ab used based on recommendation by a colleague was from Cell Signaling (#8548, stated in the catalogue to be targeted against InsP<sub>3</sub>R-type 1 phosphorylated at Ser1756). However, as noted by this reviewer, we are investigating the InsP<sub>3</sub>R-type 3, which is enriched at the MAM and does not have the Ser1756 phosphosite. In the previous data, the InsP<sub>3</sub>R phosphorylation was very efficiently blocked by Akti (**old Fig S6A**), so we believe the most likely explanation is that the Ab may be detecting other phosphosites. More importantly, the new results with the Ab targeted against the phosphorylated Akt-substrate motif RXRXX(pS/T) are very clear and robust, and completely consistent with the mechanism we are proposing.

Turning to any possible role of PKA, we would like to point out that (1) InsP<sub>3</sub>-type3 does not have the Ser1756 PKA phosphosite and (2) previous work in the literature shows that PKA does not significantly modulate the type 3 receptor (Taylor et al. Cell Calcium 2017;63:48-52; Soulsby et al. Cell Calcium 2007;42:261-70). In the study by Soulsby et al., they also showed that mutation of other potential PKA target sites in InsP<sub>3</sub>R-type 3 receptors had no effect on Ca<sup>2+</sup> flux through the channel. Therefore, we believe it is very unlikely that there is a significant role for PKA.

We have now added a note regarding the lack of effect of PKA on InsP<sub>3</sub>R-type 3 receptors in the Discussion (**page 15, last para**) and also included the reference by Soulsby et al.

***In fig. 2E-F the authors showed that in NOX4 KO Mefs displayed increased total Ca<sup>2+</sup> release from the ER through the IP3R. This MUST reflect a higher cytosolic Ca<sup>2+</sup> increase, not only mitochondrial (unless there are some parallel compensatory mechanisms inside the cytosol). Thus, the idea that Nox4 only affects the calcium release at the MAM is at odds with the alteration of global ER Ca<sup>2+</sup> efflux.***

Response: The reviewer makes a fair point that if there is a significantly greater decrease in ER Ca<sup>2+</sup> content in Nox4 KO cells after application of an agonist that opens InsP<sub>3</sub> channels, then one would normally expect a corresponding increase in cytosolic Ca<sup>2+</sup> signal since the amount of flux purely at the MAM might not be high enough to markedly reduce ER Ca<sup>2+</sup> content. In fact, when histamine is used as the agonist (Fig 2E and G), there is a very small decrease in ER Ca<sup>2+</sup> in Nox4 KO cf. WT and a trend to a slight increase in cytosolic Ca<sup>2+</sup> - so there is no real inconsistency in this experiment. The potential discrepancy is observed with ATP, where there is a larger decrease (~ 8%) in ER Ca<sup>2+</sup> in Nox4 KO cf. WT but no change in the cytosolic Ca<sup>2+</sup>. We do not have an obvious explanation for this apart from the reviewer's suggestion that there may be some parallel compensatory mechanism in the cytosol when ATP is used. We have now altered the description of these results on **page 7**, highlighting the difference between the agonists and stating that additional mechanisms may be at play in the case of ATP – please see text below.

"The results with histamine are consistent with enhanced calcium transfer from the ER to mitochondria in the Nox4 KO cells. In the case of ATP, the greater depletion of ER calcium in Nox4

KO versus WT cells suggests that there may be additional effects. This magnitude of difference in ER calcium would be expected to be accompanied by differences in cytosolic calcium transients, so there may be other compensatory mechanisms at play with this agonist.”

Dear Ajay,

Thank you for submitting a revised version of your manuscript. Please accept my apologies for the delay in getting back to you with our decision. The manuscript has now been seen by referee #2, whose comments are shown below.

As you will see, while this referee finds the role of NOX4 in regulating ER Ca<sup>2+</sup> homeostasis still doubtful, s/he has no additional concerns. Also, referee #2 suggests that you rearrange some figures. I would thus invite you to tone down all conclusions on how NOX4 regulates ER Ca<sup>2+</sup> homeostasis. In addition, there are a few editorial issues concerning text and figures that I need you to address before we can officially accept the manuscript.

-> Please indicate the number of replicas used for calculating statistics.

-> Include a "Data Availability" section (placed after Material and Methods section) even if there are no primary datasets and computer codes associated with the study.

-> See our author guidelines for more detail <http://emboj.embopress.org/authorguide>

-> Anti-Nox4 in Fig EV3A and anti-Akt in Fig S5B do not match source data. Please clarify.

-> Provide source data images at higher resolution.

-> Provide one source data file for each figure. Add boxes to source data to highlight the corresponding area in the main figure.

-> Our production/data editors have asked you to clarify several points in the figure legends (see attached document). Please incorporate these changes in the attached word document and return it with track changes activated.

-> Papers published in The EMBO Journal include a 'Synopsis' to further enhance discoverability. Synopses are displayed on the html version of the paper and are freely accessible to all readers. The synopsis includes a short standfirst as well as 2-5 one sentence bullet points that summarise the paper and are provided by the authors. I would therefore ask you to include your suggestions for bullet points. Please note that synopsis blurb and bullet points can be edited by the editors.

-> In addition, I would encourage you to provide an image for the synopsis. This image should provide a rapid overview of the question addressed in the study but still needs to be kept fairly modest since the image size cannot exceed 550x400 pixels.

Thank you again for giving us the chance to consider your manuscript for The EMBO Journal, I look forward to your revision.

Best regards,

Elisabetta



Elisabetta Argenzio, PhD  
Editor  
The EMBO Journal

Instructions for preparing your revised manuscript:

Please check that the title and abstract of the manuscript are brief, yet explicit, even to non-specialists.

When assembling figures, please refer to our figure preparation guideline in order to ensure proper formatting and readability in print as well as on screen:

<http://bit.ly/EMBOPressFigurePreparationGuideline>

**IMPORTANT:** When you send the revision we will require

- a point-by-point response to the referees' comments, with a detailed description of the changes made (as a word file).
- a word file of the manuscript text.
- individual production quality figure files (one file per figure)
- a complete author checklist, which you can download from our author guidelines (<https://www.embopress.org/page/journal/14602075/authorguide>).
- Expanded View files (replacing Supplementary Information)

Please see out instructions to authors

<https://www.embopress.org/page/journal/14602075/authorguide#expandedview>

Please remember: Digital image enhancement is acceptable practice, as long as it accurately represents the original data and conforms to community standards. If a figure has been subjected to significant electronic manipulation, this must be noted in the figure legend or in the 'Materials and Methods' section. The editors reserve the right to request original versions of figures and the original images that were used to assemble the figure.

Further information is available in our Guide For Authors:

<https://www.embopress.org/page/journal/14602075/authorguide>

The revision must be submitted online within 90 days; please click on the link below to submit the revision online before 17th Aug 2020.

<https://emboj.msubmit.net/cgi-bin/main.plex>

-----  
Referee #2:

My suggestions are to move Figs. 2G-H to supplementary items and to expand the discussion. Indeed, the analysis of cytosolic  $[Ca^{2+}]$  is not a key finding in this paper, which is mainly focused on ER-mitochondria dynamics. However, based on the cytosolic  $Ca^{2+}$  measurements presented here, some doubts remain on the role of NOX4 in regulating ER  $Ca^{2+}$  homeostasis.

EMBOJ-2019-103530

Beretta et al., Nox4 regulates InsP<sub>3</sub> receptor Ca<sup>2+</sup> release to mitochondria to promote cell survival

**Editor's comment**

*As you will see, while this referee finds the role of NOX4 in regulating ER Ca<sup>2+</sup> homeostasis still doubtful, s/he has no additional concerns. Also, referee #2 suggests that you rearrange some figures. I would thus invite you to tone down all conclusions on how NOX4 regulates ER Ca<sup>2+</sup> homeostasis.*

**Response**

We have moved Figs. 2G-H to Appendix Fig S2 (panels C, D) as requested.

We have also toned down all the parts of the manuscript dealing with NOX4 and cytosolic calcium (changes are tracked in the paper).

**Editorial issues**

**-> Please indicate the number of replicas used for calculating statistics.**

This has been indicated in the legends to each figure and in the Methods.

**-> Include a "Data Availability" section (placed after Material and Methods section) even if there are no primary datasets and computer codes associated with the study.**

Now included.

**-> Anti-Nox4 in Fig EV3A and anti-Akt in Fig S5B do not match source data. Please clarify.**

Fig EV3A – unfortunately the source blot was flipped over vertically during preparation and we also used a more exposed image. We sent by email a powerpoint showing the different exposures and the correctly flipped blot. The image with correct exposure and orientation is now included in the source blot file.

Fig S5B – the image used in the source file was a slightly different exposure from the one in the figure. We have now included the correct exposure image in the source file.

We also sent the Editor an email on 19.5.2020 with a Powerpoint file showing the different exposures for both the above figures so as to be completely transparent.

**-> Provide source data images at higher resolution.**

Now provided.

**-> Provide one source data file for each figure. Add boxes to source data to highlight the corresponding area in the main figure.**

Now done.

**-> Our production/data editors have asked you to clarify several points in the figure legends (see attached document). Please incorporate these changes in the attached word document and return it with track changes activated.**

Done.

***-> Papers published in The EMBO Journal include a 'Synopsis' to further enhance discoverability. I would therefore ask you to include your suggestions for bullet points. Please note that synopsis blurb and bullet points can be edited by the editors.***

Synopsis suggestions now included.

***-> In addition, I would encourage you to provide an image for the synopsis. This image should provide a rapid overview of the question addressed in the study but still needs to be kept fairly modest since the image size cannot exceed 550x400 pixels.***

An image for the synopsis is included.

Dear Ajay,

I am pleased to inform you that your manuscript has been accepted for publication in the EMBO Journal.

Congratulations!

Kind regards,

Elisabetta

Elisabetta Argenzio, PhD  
Editor  
The EMBO Journal

-----

Please note that it is EMBO Journal policy for the transcript of the editorial process (containing referee reports and your response letter) to be published as an online supplement to each paper. If you do NOT want this, you will need to inform the Editorial Office via email immediately. More information is available here: [http://emboj.embopress.org/about#Transparent\\_Process](http://emboj.embopress.org/about#Transparent_Process)

Your manuscript will be processed for publication in the journal by EMBO Press. Manuscripts in the PDF and electronic editions of The EMBO Journal will be copy edited, and you will be provided with page proofs prior to publication. Please note that supplementary information is not included in the proofs.

Should you be planning a Press Release on your article, please get in contact with [embojournal@wiley.com](mailto:embojournal@wiley.com) as early as possible, in order to coordinate publication and release dates.

If you have any questions, please do not hesitate to call or email the Editorial Office. Thank you for your contribution to The EMBO Journal.

\*\* Click here to be directed to your login page: <http://emboj.msubmit.net>

**YOU MUST COMPLETE ALL CELLS WITH A PINK BACKGROUND** ↓

PLEASE NOTE THAT THIS CHECKLIST WILL BE PUBLISHED ALONGSIDE YOUR PAPER

Corresponding Author Name: Ajay Shah

Journal Submitted to: EMBO J

Manuscript Number: EMBOJ-2019-103530

### Reporting Checklist For Life Sciences Articles (Rev. June 2017)

This checklist is used to ensure good reporting standards and to improve the reproducibility of published results. These guidelines are consistent with the Principles and Guidelines for Reporting Preclinical Research issued by the NIH in 2014. Please follow the journal's authorship guidelines in preparing your manuscript.

#### A- Figures

##### 1. Data

The data shown in figures should satisfy the following conditions:

- the data were obtained and processed according to the field's best practice and are presented to reflect the results of the experiments in an accurate and unbiased manner.
- figure panels include only data points, measurements or observations that can be compared to each other in a scientifically meaningful way.
- graphs include clearly labeled error bars for independent experiments and sample sizes. Unless justified, error bars should not be shown for technical replicates.
- if  $n < 5$ , the individual data points from each experiment should be plotted and any statistical test employed should be justified.
- Source Data should be included to report the data underlying graphs. Please follow the guidelines set out in the author ship guidelines on Data Presentation.

##### 2. Captions

Each figure caption should contain the following information, for each panel where they are relevant:

- a specification of the experimental system investigated (eg cell line, species name).
- the assay(s) and method(s) used to carry out the reported observations and measurements
- an explicit mention of the biological and chemical entity(ies) that are being measured.
- an explicit mention of the biological and chemical entity(ies) that are altered/varied/perturbed in a controlled manner.
- the exact sample size (n) for each experimental group/condition, given as a number, not a range;
- a description of the sample collection allowing the reader to understand whether the samples represent technical or biological replicates (including how many animals, litters, cultures, etc.).
- a statement of how many times the experiment shown was independently replicated in the laboratory.
- definitions of statistical methods and measures:
  - common tests, such as t-test (please specify whether paired vs. unpaired), simple  $\chi^2$  tests, Wilcoxon and Mann-Whitney tests, can be unambiguously identified by name only, but more complex techniques should be described in the methods section;
  - are tests one-sided or two-sided?
  - are there adjustments for multiple comparisons?
  - exact statistical test results, e.g., P values = x but not P values < x;
  - definition of 'center values' as median or average;
  - definition of error bars as s.d. or s.e.m.

Any descriptions too long for the figure legend should be included in the methods section and/or with the source data.

In the pink boxes below, please ensure that the answers to the following questions are reported in the manuscript itself. Every question should be answered. If the question is not relevant to your research, please write NA (non applicable). We encourage you to include a specific subsection in the methods section for statistics, reagents, animal models and human subjects.

#### B- Statistics and general methods

Please fill out these boxes ↓ (Do not worry if you cannot see all your text once you press return)

|                                                                                                                                                                                         |                                                                                                                                                                                                                                    |
|-----------------------------------------------------------------------------------------------------------------------------------------------------------------------------------------|------------------------------------------------------------------------------------------------------------------------------------------------------------------------------------------------------------------------------------|
| 1.a. How was the sample size chosen to ensure adequate power to detect a pre-specified effect size?                                                                                     | For in vitro studies, a typical sample size was 3-6 would allow detection of at least a 30% difference with 90% power for P<0.05. For imaging, at least 50-100 cells per group were used based on a higher within-group variation. |
| 1.b. For animal studies, include a statement about sample size estimate even if no statistical methods were used.                                                                       | A sample size of 6-7 animals per group was used to allow detection of at least 30-35% difference between groups with 90% power for P<0.05.                                                                                         |
| 2. Describe inclusion/exclusion criteria if samples or animals were excluded from the analysis. Were the criteria pre-established?                                                      | N/A                                                                                                                                                                                                                                |
| 3. Were any steps taken to minimize the effects of subjective bias when allocating animals/samples to treatment (e.g. randomization procedure)? If yes, please describe.                | In experiments with multiple treatments, allocation to a treatment was random and the different experiments were conducted in parallel.                                                                                            |
| For animal studies, include a statement about randomization even if no randomization was used.                                                                                          | Allocation to active or control groups was undertaken randomly.                                                                                                                                                                    |
| 4.a. Were any steps taken to minimize the effects of subjective bias during group allocation or/and when assessing results (e.g. blinding of the investigator)? If yes please describe. | Analyses of assays (FACS, calcium imaging, EM, proximity ligation) were undertaken blinded to the group.                                                                                                                           |
| 4.b. For animal studies, include a statement about blinding even if no blinding was done                                                                                                | Ischaemia-reperfusion studies and analyses were performed blinded.                                                                                                                                                                 |
| 5. For every figure, are statistical tests justified as appropriate?                                                                                                                    | Yes                                                                                                                                                                                                                                |
| Do the data meet the assumptions of the tests (e.g., normal distribution)? Describe any methods used to assess it.                                                                      | Yes                                                                                                                                                                                                                                |
| Is there an estimate of variation within each group of data?                                                                                                                            | Yes                                                                                                                                                                                                                                |

#### USEFUL LINKS FOR COMPLETING THIS FORM

<http://www.antibodypedia.com>  
<http://1degreebio.org>  
<http://www.equator-network.org/reporting-guidelines/improving-bioscience-research-repor>  
  
<http://grants.nih.gov/grants/olaw/olaw.htm>  
<http://www.mrc.ac.uk/Ourresearch/Ethicsresearchguidance/Useofanimals/index.htm>  
<http://ClinicalTrials.gov>  
<http://www.consort-statement.org>  
<http://www.consort-statement.org/checklists/view/32-consort/66-title>  
  
<http://www.equator-network.org/reporting-guidelines/reporting-recommendations-for-tum>  
  
<http://datadryad.org>  
  
<http://figshare.com>  
  
<http://www.ncbi.nlm.nih.gov/gap>  
  
<http://www.ebi.ac.uk/ega>  
  
<http://biomodels.net/>  
  
<http://biomodels.net/miriam/>  
<http://jij.biochem.sun.ac.za>  
[http://oba.od.nih.gov/biosecurity/biosecurity\\_documents.html](http://oba.od.nih.gov/biosecurity/biosecurity_documents.html)  
<http://www.selectagents.gov/>

|                                                                                   |     |
|-----------------------------------------------------------------------------------|-----|
| Is the variance similar between the groups that are being statistically compared? | Yes |
|-----------------------------------------------------------------------------------|-----|

### C- Reagents

|                                                                                                                                                                                                                                                                                                                                                                  |      |
|------------------------------------------------------------------------------------------------------------------------------------------------------------------------------------------------------------------------------------------------------------------------------------------------------------------------------------------------------------------|------|
| 6. To show that antibodies were profiled for use in the system under study (assay and species), provide a citation, catalog number and/or clone number, supplementary information or reference to an antibody validation profile. e.g., Antibodypedia ( <a href="#">see link list at top right</a> ), 1DegreeBio ( <a href="#">see link list at top right</a> ). | Done |
| 7. Identify the source of cell lines and report if they were recently authenticated (e.g., by STR profiling) and tested for mycoplasma contamination.                                                                                                                                                                                                            | Done |

\* for all hyperlinks, please see the table at the top right of the document

### D- Animal Models

|                                                                                                                                                                                                                                                                                                                                                                                                                                          |      |
|------------------------------------------------------------------------------------------------------------------------------------------------------------------------------------------------------------------------------------------------------------------------------------------------------------------------------------------------------------------------------------------------------------------------------------------|------|
| 8. Report species, strain, gender, age of animals and genetic modification status where applicable. Please detail housing and husbandry conditions and the source of animals.                                                                                                                                                                                                                                                            | Done |
| 9. For experiments involving live vertebrates, include a statement of compliance with ethical regulations and identify the committee(s) approving the experiments.                                                                                                                                                                                                                                                                       | Done |
| 10. We recommend consulting the ARRIVE guidelines ( <a href="#">see link list at top right</a> ) (PLoS Biol. 8(6), e1000412, 2010) to ensure that other relevant aspects of animal studies are adequately reported. See author guidelines, under 'Reporting Guidelines'. See also: NIH ( <a href="#">see link list at top right</a> ) and MRC ( <a href="#">see link list at top right</a> ) recommendations. Please confirm compliance. | Yes  |

### E- Human Subjects

|                                                                                                                                                                                                                                                                                                                                                        |     |
|--------------------------------------------------------------------------------------------------------------------------------------------------------------------------------------------------------------------------------------------------------------------------------------------------------------------------------------------------------|-----|
| 11. Identify the committee(s) approving the study protocol.                                                                                                                                                                                                                                                                                            | N/A |
| 12. Include a statement confirming that informed consent was obtained from all subjects and that the experiments conformed to the principles set out in the WMA Declaration of Helsinki and the Department of Health and Human Services Belmont Report.                                                                                                | N/A |
| 13. For publication of patient photos, include a statement confirming that consent to publish was obtained.                                                                                                                                                                                                                                            | N/A |
| 14. Report any restrictions on the availability (and/or on the use) of human data or samples.                                                                                                                                                                                                                                                          | N/A |
| 15. Report the clinical trial registration number (at ClinicalTrials.gov or equivalent), where applicable.                                                                                                                                                                                                                                             | N/A |
| 16. For phase II and III randomized controlled trials, please refer to the CONSORT flow diagram ( <a href="#">see link list at top right</a> ) and submit the CONSORT checklist ( <a href="#">see link list at top right</a> ) with your submission. See author guidelines, under 'Reporting Guidelines'. Please confirm you have submitted this list. | N/A |
| 17. For tumor marker prognostic studies, we recommend that you follow the REMARK reporting guidelines ( <a href="#">see link list at top right</a> ). See author guidelines, under 'Reporting Guidelines'. Please confirm you have followed these guidelines.                                                                                          | N/A |

### F- Data Accessibility

|                                                                                                                                                                                                                                                                                                                                                                                                                                                                                                                                                                                                                                                                                                                                                         |      |
|---------------------------------------------------------------------------------------------------------------------------------------------------------------------------------------------------------------------------------------------------------------------------------------------------------------------------------------------------------------------------------------------------------------------------------------------------------------------------------------------------------------------------------------------------------------------------------------------------------------------------------------------------------------------------------------------------------------------------------------------------------|------|
| 18: Provide a "Data Availability" section at the end of the Materials & Methods, listing the accession codes for data generated in this study and deposited in a public database (e.g. RNA-Seq data: Gene Expression Omnibus GSE39462, Proteomics data: PRIDE PXD000208 etc.) Please refer to our author guidelines for 'Data Deposition'.<br><br>Data deposition in a public repository is mandatory for:<br>a. Protein, DNA and RNA sequences<br>b. Macromolecular structures<br>c. Crystallographic data for small molecules<br>d. Functional genomics data<br>e. Proteomics and molecular interactions                                                                                                                                              | Done |
| 19. Deposition is strongly recommended for any datasets that are central and integral to the study; please consider the journal's data policy. If no structured public repository exists for a given data type, we encourage the provision of datasets in the manuscript as a Supplementary Document (see author guidelines under 'Expanded View' or in unstructured repositories such as Dryad ( <a href="#">see link list at top right</a> ) or Figshare ( <a href="#">see link list at top right</a> ).                                                                                                                                                                                                                                              | N/A  |
| 20. Access to human clinical and genomic datasets should be provided with as few restrictions as possible while respecting ethical obligations to the patients and relevant medical and legal issues. If practically possible and compatible with the individual consent agreement used in the study, such data should be deposited in one of the major public access-controlled repositories such as dbGAP ( <a href="#">see link list at top right</a> ) or EGA ( <a href="#">see link list at top right</a> ).                                                                                                                                                                                                                                       | N/A  |
| 21. Computational models that are central and integral to a study should be shared without restrictions and provided in a machine-readable form. The relevant accession numbers or links should be provided. When possible, standardized format (SBML, CellML) should be used instead of scripts (e.g. MATLAB). Authors are strongly encouraged to follow the MIRIAM guidelines ( <a href="#">see link list at top right</a> ) and deposit their model in a public database such as Biocompare ( <a href="#">see link list at top right</a> ) or JWS Online ( <a href="#">see link list at top right</a> ). If computer source code is provided with the paper, it should be deposited in a public repository or included in supplementary information. | N/A  |

### G- Dual use research of concern

|                                                                                                                                                                                                                                                                                                                                   |     |
|-----------------------------------------------------------------------------------------------------------------------------------------------------------------------------------------------------------------------------------------------------------------------------------------------------------------------------------|-----|
| 22. Could your study fall under dual use research restrictions? Please check biosecurity documents ( <a href="#">see link list at top right</a> ) and list of select agents and toxins (APHIS/CDC) ( <a href="#">see link list at top right</a> ). According to our biosecurity guidelines, provide a statement only if it could. | N/A |
|-----------------------------------------------------------------------------------------------------------------------------------------------------------------------------------------------------------------------------------------------------------------------------------------------------------------------------------|-----|
